# Supplementary material for: Comparison of cricket diet with peanut-based and milk-based diets in the recovery from protein malnutrition in mice and the impact on growth, metabolism and immune function
Source: PubMed Central journal article supplement (PMC7289377; doi:10.1371/journal.pone.0234559), 2020-06-11
Supplement: pone.0234559.s002.pdf [file pone.0234559.s002.pdf]

S2: EnzyChrom Triglyceride Assay

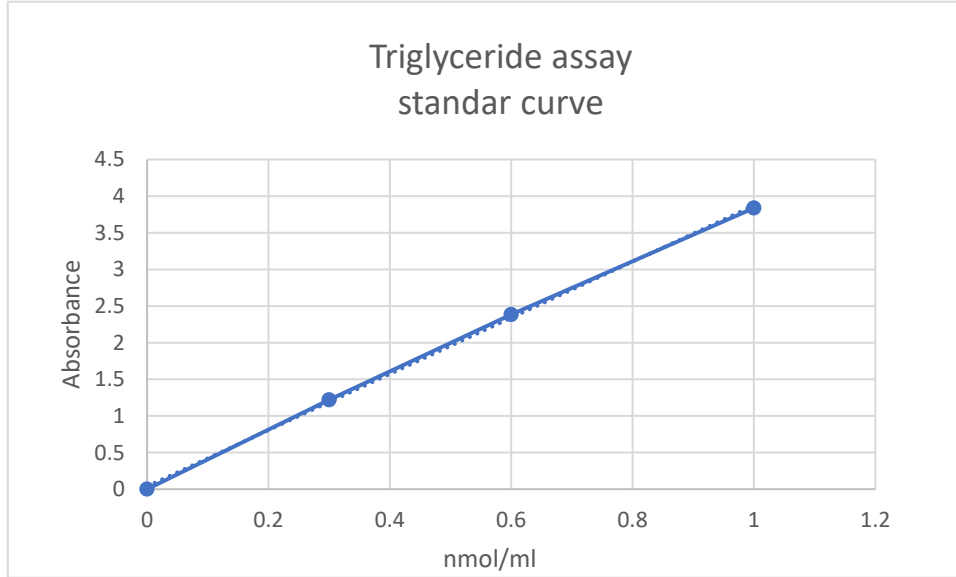

| Diet   | 2020 hypoprotein | 2018 cricket | milk   | peanut |
|--------|------------------|--------------|--------|--------|
| mmol/l | 1.2460           | 0.5522       | 0.7224 | 0.7615 |
|        | 1.6085           | 2.5494       | 1.7278 | 0.4889 |
|        | 1.2075           | 0.8854       | 0.6767 | 1.1651 |
|        | 0.6350           | 1.8002       | 0.3676 | 1.2525 |
|        | 0.8378           | 1.0901       | 0.6004 | 0.7986 |
|        | 0.6030           | 2.0317       | 1.0758 | 1.9906 |
|        | 0.6135           | 1.2381       | 0.7778 | 1.1957 |
|        | 1.0686           | 0.7973       | 0.5059 | 0.8886 |
|        | 1.0947           | 1.5081       | 0.5743 | 1.7774 |
|        | 1.2147           | 1.9085       | 0.4993 | 1.4018 |
|        |                  |              | 0.8006 | 0.9890 |
|        |                  |              | 0.7184 |        |
