# Supplementary material for: Comparison of cricket diet with peanut-based and milk-based diets in the recovery from protein malnutrition in mice and the impact on growth, metabolism and immune function
Source: PubMed Central journal article supplement (PMC7289377; doi:10.1371/journal.pone.0234559), 2020-06-11
Supplement: pone.0234559.s003.pdf [file pone.0234559.s003.pdf]

S3: Leptin Quantikine ELISA

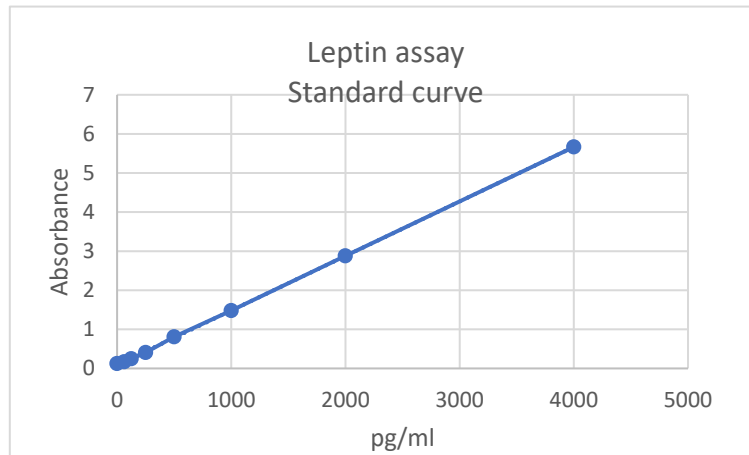

| Diet  | 2020     | hypoprotein | 2018     | cricket  | milk     | peanut   |
|-------|----------|-------------|----------|----------|----------|----------|
| pg/ml | 3049.86  | 19412.24    | 2540.33  | 21292.24 | 11150.81 | 2784.62  |
|       | 6506.05  | 15957.00    | 14668.90 | 7820.81  | 6132.24  | 8143.19  |
|       | 7876.05  | 13671.76    | 6247.95  | 9812.24  | 6560.81  | 17274.14 |
|       | 5345.10  | 10814.62    | 36456.52 | 3793.19  | 8537.48  | 16919.86 |
|       | 8793.67  | 10757.00    | 16030.81 | 10091.29 | 5347.95  | 3401.76  |
|       | 10417.95 | 1504.00     | 11678.90 | 36486.05 | 12551.29 | 14569.38 |
|       | 9155.10  | 18363.67    | 19567.48 | 11374.62 | 6136.52  | 21462.71 |
|       | 7055.57  | 14590.81    | 15754.62 | 10667.95 | 1887.48  | 15215.10 |
|       | 8546.52  | 14322.24    | 32400.81 | 2861.29  | 5219.38  | 12783.67 |
|       | 12110.81 | 17214.14    |          | 3774.62  | 10132.71 | 11544.62 |
|       |          | 11848.90    |          | 13688.43 |          |          |
|       |          | 20050.33    |          | 16151.76 |          |          |
