# Supplementary material for: Comparison of cricket diet with peanut-based and milk-based diets in the recovery from protein malnutrition in mice and the impact on growth, metabolism and immune function
Source: PubMed Central journal article supplement (PMC7289377; doi:10.1371/journal.pone.0234559), 2020-06-11
Supplement: pone.0234559.s004.pdf [file pone.0234559.s004.pdf]

S4: Adiponectin Quantikine ELISA

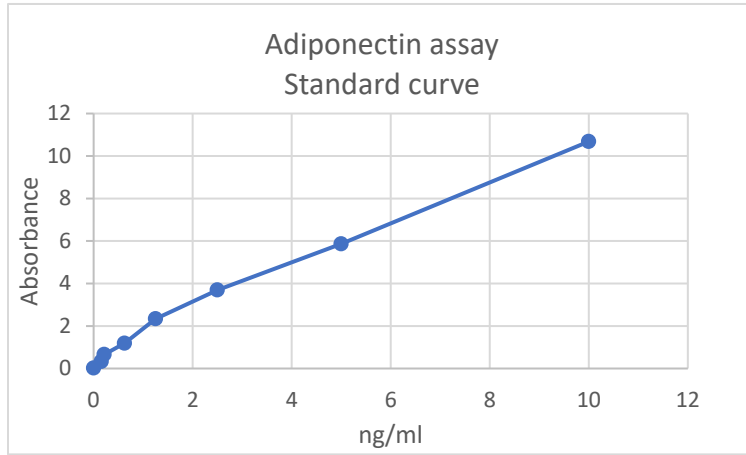

| Diet  | 2020    | hypoprotein | 2018    | cricket | milk    | peanut  |
|-------|---------|-------------|---------|---------|---------|---------|
| ng/ml | 6032.95 | 15480.38    | 7320.91 | 8029.55 | 8435.70 | 8124.42 |
|       | 5765.87 | 11807.47    | 7060.42 | 6611.25 | 7748.64 | 6388.47 |
|       | 6306.88 | 15444.03    | 7152.33 | 5490.58 | 6585.75 | 7014.58 |
|       | 6666.26 | 13204.97    | 8768.80 | 4983.14 | 4676.36 | 6046.38 |
|       | 6542.65 | 9024.42     | 6011.86 | 7375.31 | 5346.75 | 7274.66 |
|       | 5956.33 | 12916.83    | 8433.62 | 8242.37 | 6662.33 | 3994.38 |
|       | 4326.74 | 10705.72    | 6607.33 | 7939.06 | 6235.21 | 6252.63 |
|       | 6780.56 | 13067.67    | 6326.28 | 7136.32 | 4866.39 | 4997.78 |
|       | 5895.22 | 11271.17    | 8739.34 | 4781.10 | 6833.93 | 7080.37 |
|       | 6994.67 | 12354.48    | 8412.78 | 7885.71 | 6441.07 | 6411.83 |
|       |         | 17254.54    |         | 6764.76 |         | 5737.43 |
|       |         | 10493.91    |         | 8021.31 |         |         |
