# Supplementary material for: Comparison of cricket diet with peanut-based and milk-based diets in the recovery from protein malnutrition in mice and the impact on growth, metabolism and immune function
Source: PubMed Central journal article supplement (PMC7289377; doi:10.1371/journal.pone.0234559), 2020-06-11
Supplement: pone.0234559.s005.pdf [file pone.0234559.s005.pdf]

S5: Gene expression, fold change

hypoprotein (HP) diet vs 2020 diet

| TLR4 |      | TNF $\alpha$ |      | IL1- $\beta$ |      | IFN $\gamma$ |      | IL4  |      |
|------|------|--------------|------|--------------|------|--------------|------|------|------|
| 2020 | HP   | 2020         | HP   | 2020         | HP   | 2020         | HP   | 2020 | HP   |
| 0.98 | 0.61 | 0.83         | 1.44 | 0.98         | 0.49 | 0.40         | 1.08 | 2.44 | 2.77 |
| 1.31 | 0.78 | 0.88         | 0.83 | 1.08         | 0.67 | 0.85         | 0.95 | 0.29 | 2.12 |
| 0.73 | 0.68 | 0.94         | 0.65 | 0.86         | 0.69 | 3.11         | 1.00 | 0.96 | 2.62 |
| 0.86 | 0.57 | 1.21         | 0.43 | 0.99         | 0.36 | 1.16         | 0.79 | 1.28 | 2.48 |
| 1.23 | 0.56 | 1.20         | 0.59 | 1.11         | 0.42 | 0.81         | 1.01 | 1.14 | 2.46 |
| 0.44 | 0.60 | 2.56         |      | 0.54         | 0.49 | 3.09         |      | 2.06 |      |
