# Supplementary material for: Comparison of cricket diet with peanut-based and milk-based diets in the recovery from protein malnutrition in mice and the impact on growth, metabolism and immune function
Source: PubMed Central journal article supplement (PMC7289377; doi:10.1371/journal.pone.0234559), 2020-06-11
Supplement: pone.0234559.s006.pdf [file pone.0234559.s006.pdf]

S6: Gene expression; end of recovery period

| <b>TLR4</b>                   |         |      |        |
|-------------------------------|---------|------|--------|
| 2018                          | cricket | milk | peanut |
| 1.33                          | 0.04    | 1.19 | 0.76   |
| 0.93                          | 1.15    | 0.60 | 0.60   |
| 0.86                          | 0.98    | 0.69 | 0.75   |
| 0.95                          | 1.04    | 0.56 | 0.57   |
|                               | 0.50    |      | 0.31   |
|                               | 0.64    |      |        |
| <b>TNF<math>\alpha</math></b> |         |      |        |
| 2018                          | cricket | milk | peanut |
| 0.75                          | 1.14    | 1.36 | 0.75   |
| 0.82                          | 1.05    | 0.70 | 0.56   |
| 1.00                          | 1.20    | 1.09 | 0.65   |
| 1.63                          | 0.73    | 0.75 | 0.57   |
|                               | 0.87    |      | 0.26   |
|                               | 1.01    |      |        |
| <b>IL1<math>\beta</math></b>  |         |      |        |
| 2018                          | cricket | milk | peanut |
| 0.65                          | 1.18    | 1.15 | 1.11   |
| 1.40                          | 1.15    | 0.87 | 0.49   |
| 0.73                          | 1.11    | 1.04 | 0.83   |
| 1.50                          | 1.01    | 0.67 | 0.37   |
|                               | 0.56    |      | 0.52   |
|                               | 1.10    |      |        |
| <b>IFN<math>\gamma</math></b> |         |      |        |
| 2018                          | cricket | milk | peanut |
| 0.25                          | 1.25    | 0.95 | 0.86   |
| 3.24                          | 0.70    | 0.52 | 0.50   |
| 0.70                          | 0.85    | 2.50 | 0.86   |
| 1.75                          | 0.97    | 0.44 | 0.52   |
|                               | 1.19    |      | 2.43   |
|                               | 1.70    |      |        |
| <b>IL4</b>                    |         |      |        |
| 2018                          | cricket | milk | peanut |
| 0.47                          | 0.86    | 0.71 | 0.64   |
| 2.62                          | 1.82    | 0.98 | 0.43   |
| 0.63                          | 0.31    | 0.40 | 0.77   |
| 1.30                          | 1.38    | 1.87 | 0.91   |
|                               | 0.54    |      | 0.67   |
|                               | 0.63    |      |        |
